# Supplementary material
Source: MDPI journal article supplement (https://www.mdpi.com/2073-4395/13/3/908)
Supplement: s1 [file s1]

# Supplementary Materials:

**Supplementary Table S1.** The main biological traits and their criteria for evaluation

| Agronomic traits               | Statistical criteria for agronomic traits                                                                                                                                                                                                          |
|--------------------------------|----------------------------------------------------------------------------------------------------------------------------------------------------------------------------------------------------------------------------------------------------|
| Plant height                   | Distance from the base of the stem to the apex of the longest stem, unit: cm;                                                                                                                                                                      |
| Flag leaf length               | Distance from leaf base to tip of the longest leaf, unit: cm;                                                                                                                                                                                      |
| Flag leaf width                | Leaf width from leaf base to the third, unit: cm;                                                                                                                                                                                                  |
| Second section's stem length   | Length of the second stem, unit: cm;                                                                                                                                                                                                               |
| Second section's stem diameter | Width of the second stem, unit: cm;                                                                                                                                                                                                                |
| Number of main stem nodes      | Number of nodes of the main stem of the plant, unit: nodes;                                                                                                                                                                                        |
| Number of spikes per plant     | Several spikes per plant, unit: spike.                                                                                                                                                                                                             |
| Plant growth period            | 1: The length of the second stem in the seedling stage, unit: cm;<br>2: Jointing stage;<br>3: Heading period;<br>4: Florescence;<br>5: Mature period.                                                                                              |
| Tillering                      | 1: None tillering (number of tillers =0);<br>2: Weak tillering (number of tillers =1);<br>3: Moderate tillering (number of tillers =2);<br>4: Strong tillering (number of tillers =3);<br>5: Very strong tillering (number of tillers $\geq 4$ ).  |
| branchiness                    | 1: No branching (number of branches =0);<br>2: weak branching (number of branches =1);<br>3: Medium branching (number of branches =2);<br>4: Strong branching (number of branches =3);<br>5: Very strong branching (number of branches $\geq 4$ ). |
| Spike type                     | 1: Tight;<br>2: Medium tight;<br>3: Medium dispersion;<br>4: Lateral dispersion;<br>5: Around dispersion.                                                                                                                                          |
| Spike shape                    | 1: Spindle-shaped;<br>2: Cylindrical;<br>3: Rod shape;<br>4: Cup shape;<br>6: Spherical;<br>7: Umbrella-type;<br>8: Broom shape.                                                                                                                   |
| Glume color                    | 1: White;<br>2: Yellow;<br>3: Grey;<br>4: Red;<br>5: Brown;<br>6: Purple;<br>7: Black.                                                                                                                                                             |
| Chaff coating degree           | 1: Naked;<br>2: Coating 1/4;<br>3: Coating 1/2;<br>4: Coating 3/4;<br>5: All coated.                                                                                                                                                               |
| Abortion degree                | 1. Unbeaten;<br>2. Minority abortion;                                                                                                                                                                                                              |

| Agronomic traits | Statistical criteria for agronomic traits |
|------------------|-------------------------------------------|
|                  | 3: Majority abortion.                     |

**Supplementary Table S2.** Primer information for the *SbGA2o3* gene

| Primer               | Primer sequence(5'-3') | Annealing temperature(°C) | Size of PCR products (bp) |
|----------------------|------------------------|---------------------------|---------------------------|
| <i>SbGA2o3F1</i>     | TGCATCCTTTTCGTCTCCCT   | 62.0                      | 825                       |
| <i>SbGA2o3R1</i>     | GCAAAGCAGGGGTCAATCAA   | 57.4                      | 825                       |
| <i>SbGA2o3F2</i>     | TTGATTGACCCCTGCTTTGC   | 56.1                      | 819                       |
| <i>SbGA2o3R2</i>     | AGACTTGAGGCTGTTGGTCA   | 56.1                      | 819                       |
| <i>SbGA2o3F3</i>     | GCCCAGTTTGAGAAGCGTAG   | 56.4                      | 801                       |
| <i>SbGA2o3R3</i>     | GAACCAAACAGAGGCGAGTG   | 56.4                      | 801                       |
| <i>SbUBQ10QPCRf</i>  | CCGTGGTGGCCAGTAAGTTC   | 55.7                      |                           |
| <i>SbUBQ10QPCRR</i>  | GGACTCAACATGGGCTCTGC   | 55.7                      |                           |
| <i>SbGA2o3 QPCRf</i> | GGTGACCAACAGCCTCAAGT   | 55.7                      |                           |
| <i>SbGA2o3 QPCRR</i> | TACGCGGCCTTCTTGTACTC   | 55.7                      |                           |
